# Supplementary material for: Dopamine pathway and Parkinson’s risk variants are associated with levodopa-induced dyskinesia
Source: bioRxiv or medRxiv preprint supplement (doi:10.1101/2023.08.28.23294610), 2023-09-20

Supplementary Fig. 1 – Q-Q plot of LID risk GWAS using logistic regression

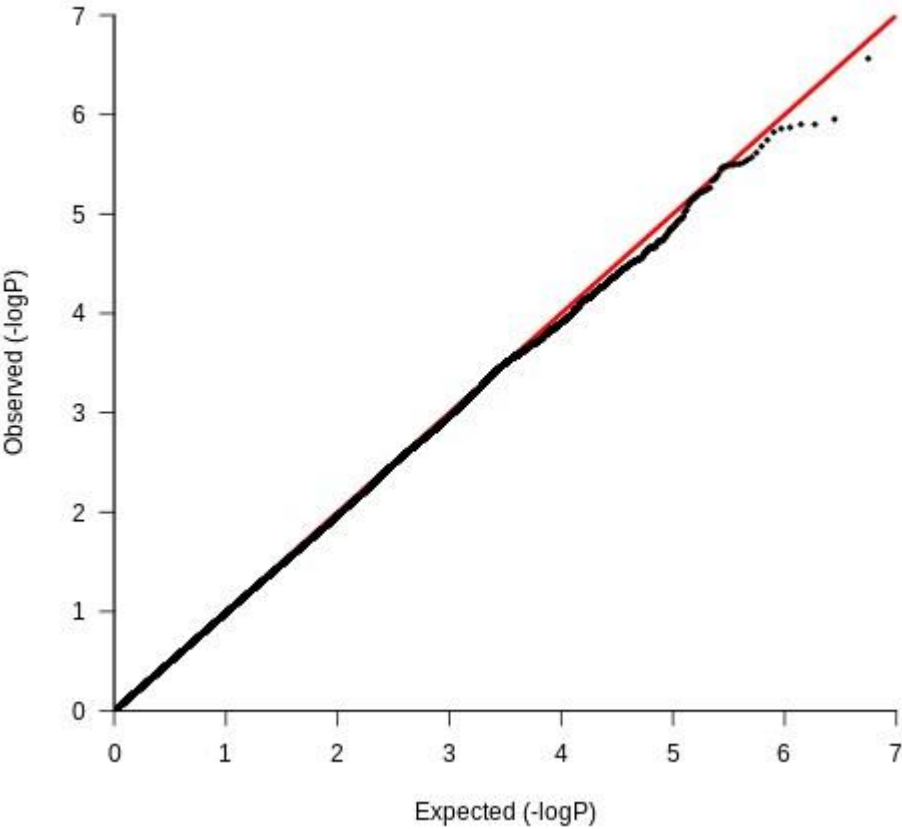

Supplementary Fig. 2 - Q-Q plot of progression to LID GWAS using Cox regression

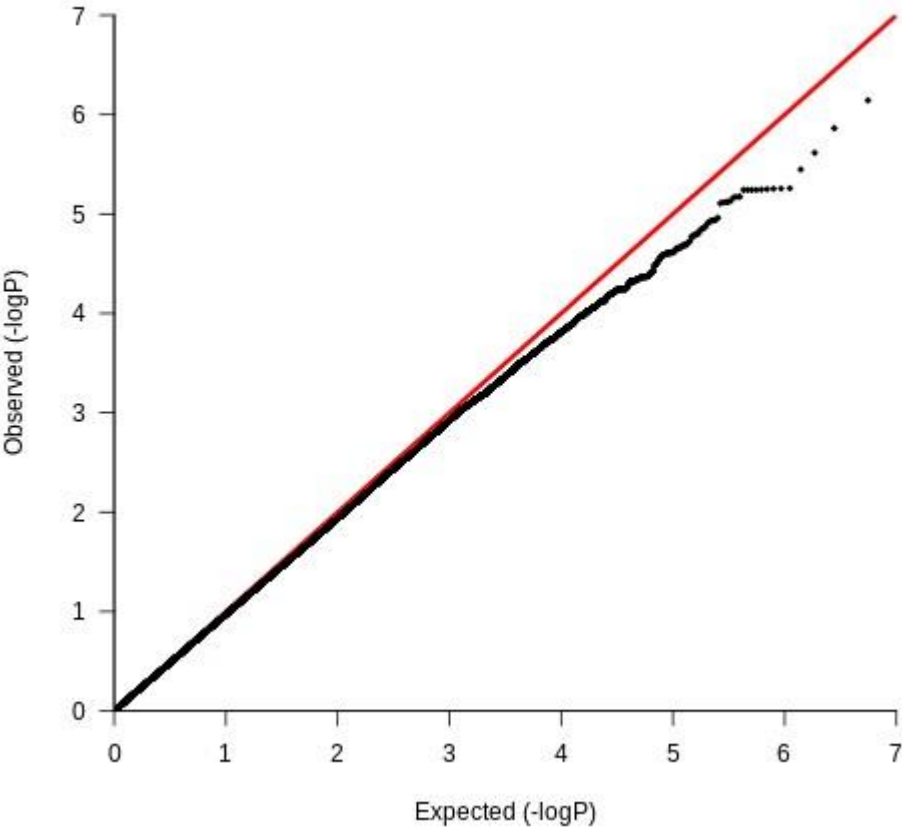

Supplementary Fig. 3 – Manhattan plot of LID risk GWAS

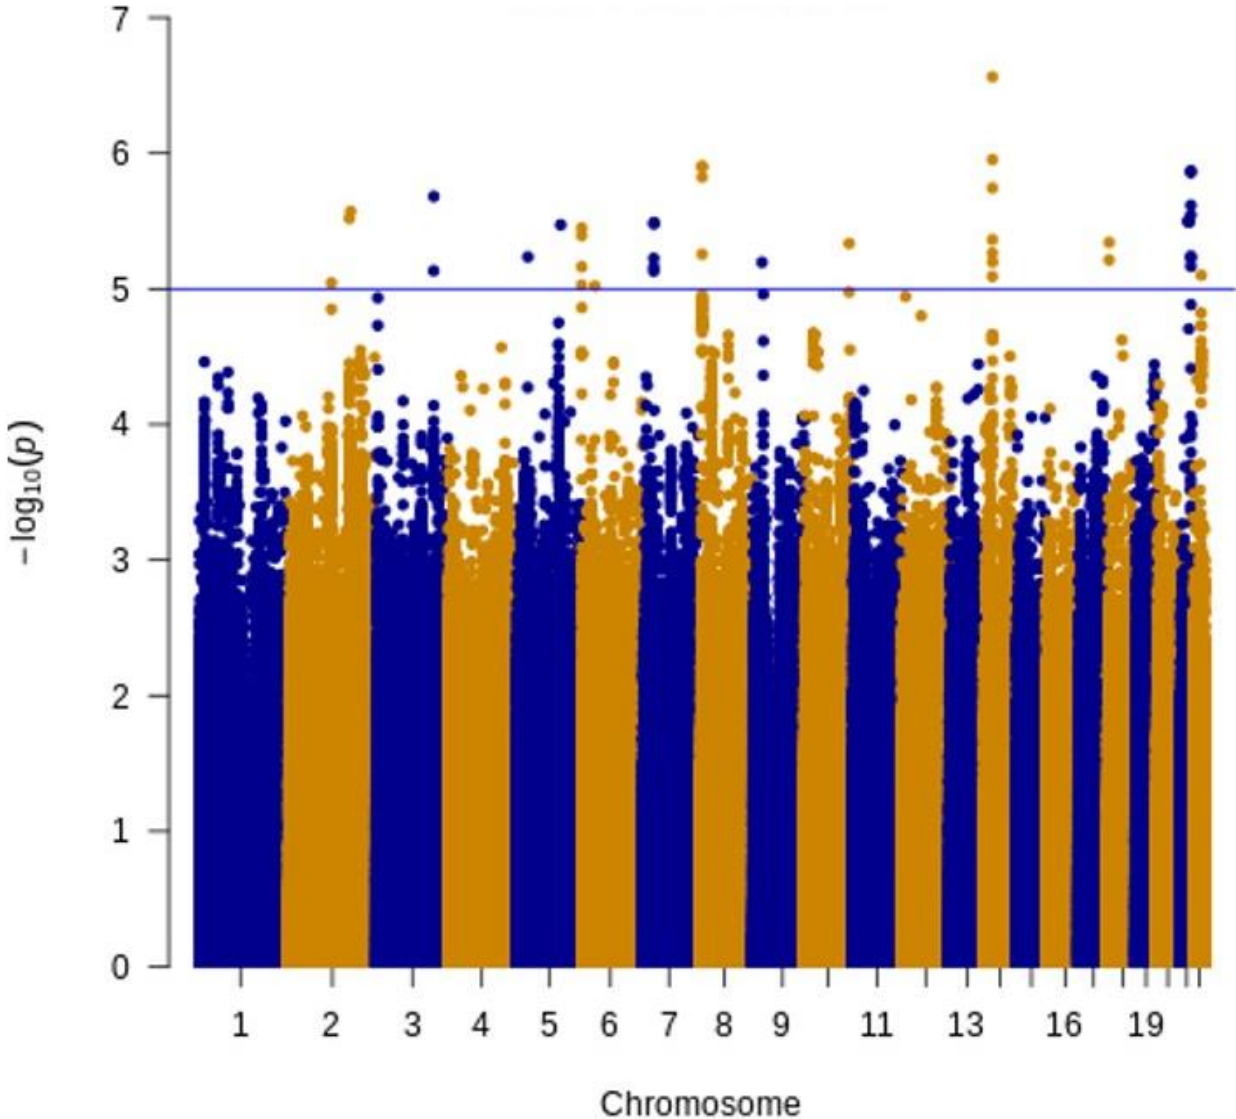

Supplementary Fig. 4 – Manhattan plot of progression to LID GWAS

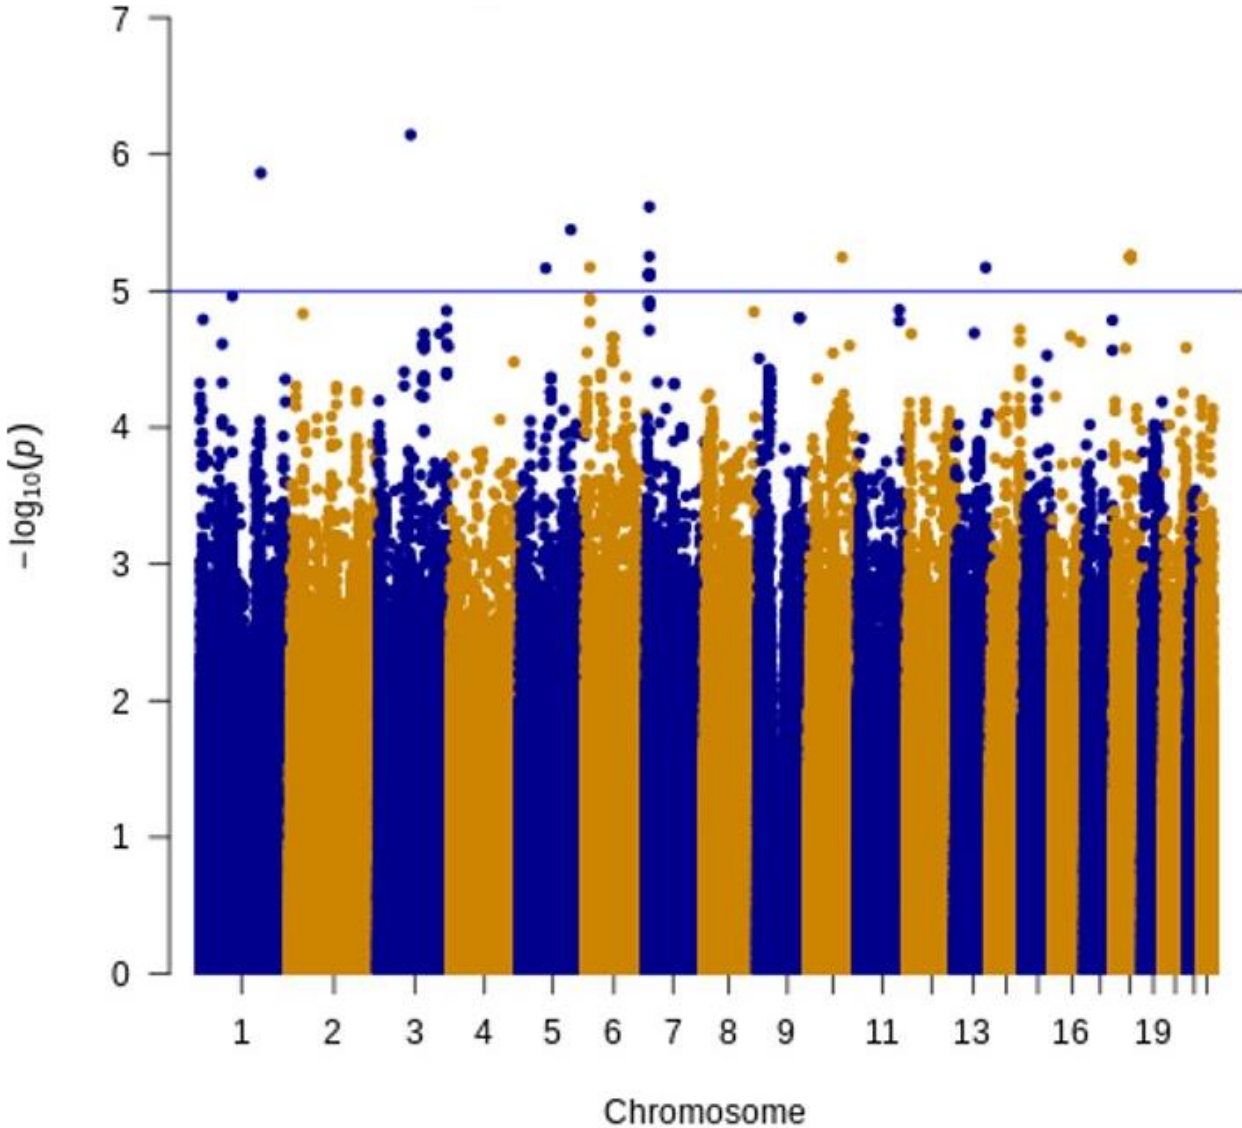

**Supplementary Fig. 5 - A-B - Cox regression between PRS including PD risk variants and progression to LID**

**A**

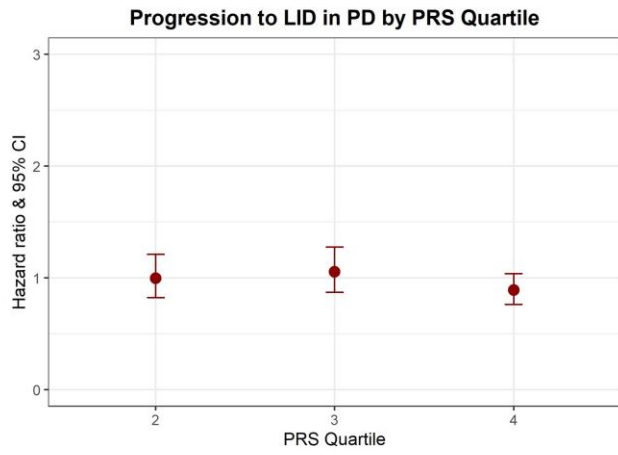

**B**

**PRS PD - progression to LID**

FE Model (Study p = 0.0557; I<sup>2</sup> = 0.0%)

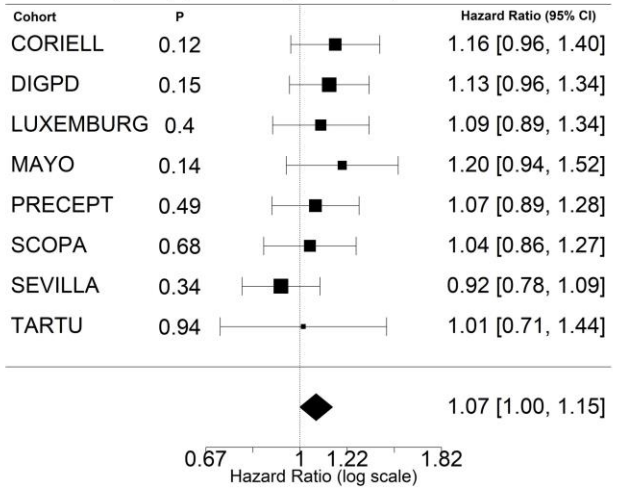

**Supplementary Fig. 6 A-B - Logistic regression between the dopaminergic transmission pathway PES and LID risk**

**A**

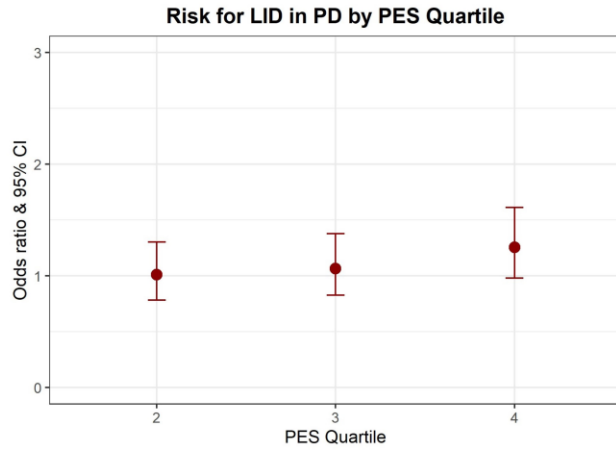

**B**

**PES Dopaminergic transmission: LID risk**

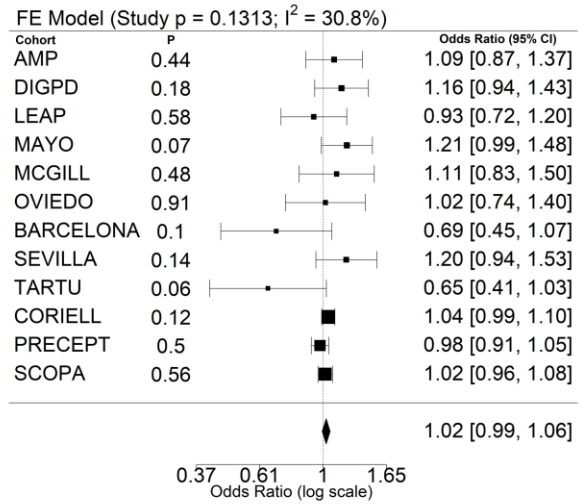

Supplement: Supplementary file [file media-11.pdf]
